# Supplementary material for: Activation of recombinational repair in Ewing sarcoma cells carrying EWS-FLI1 fusion gene by chromosome translocation
Source: PubMed Central journal article supplement (PMC9427769; doi:10.1038/s41598-022-19164-x), 2022-08-30
Supplement: 41598_2022_19164_MOESM2_ESM.pdf [file 41598_2022_19164_MOESM2_ESM.pdf]

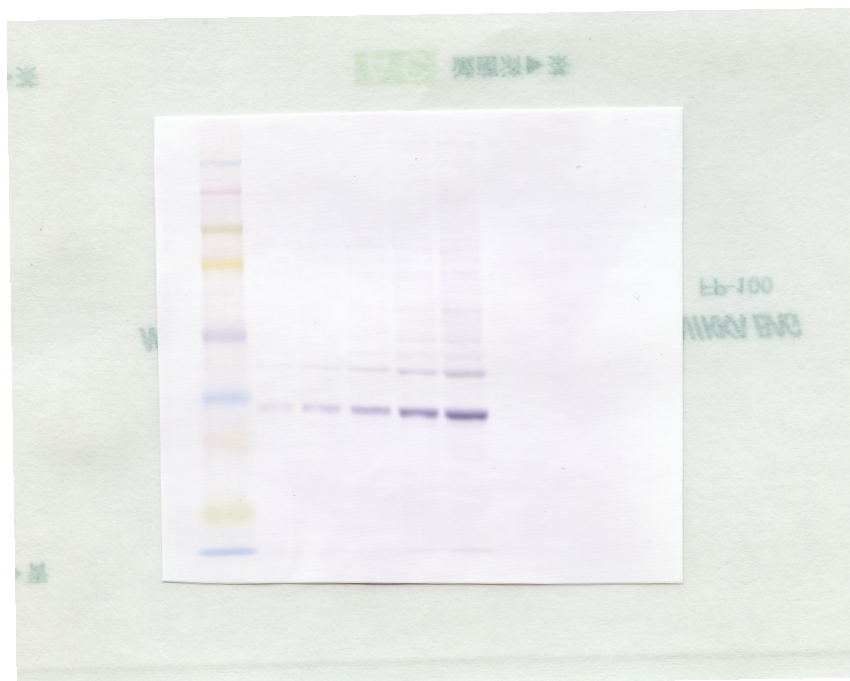

Fig. S1A. uncropped

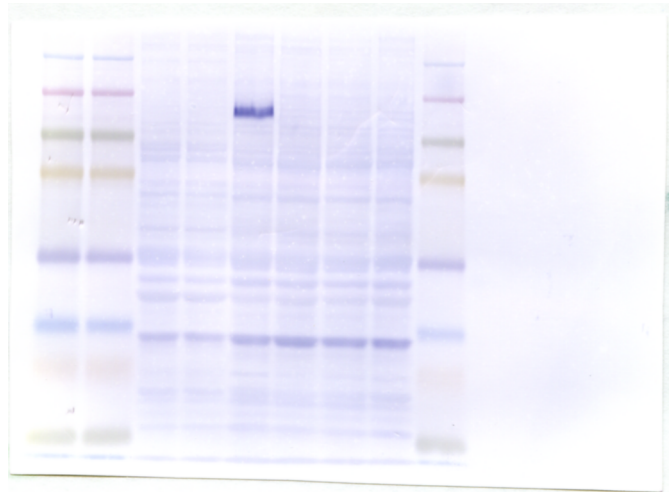

Fig. S1B. uncropped

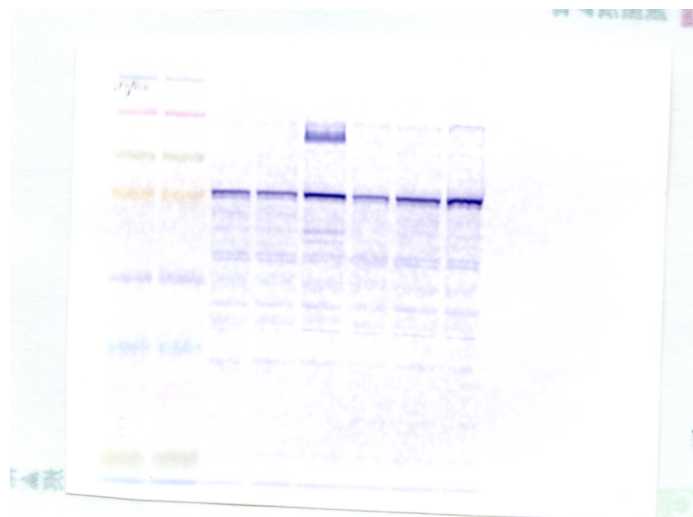

Fig. S2. MRE11. uncropped

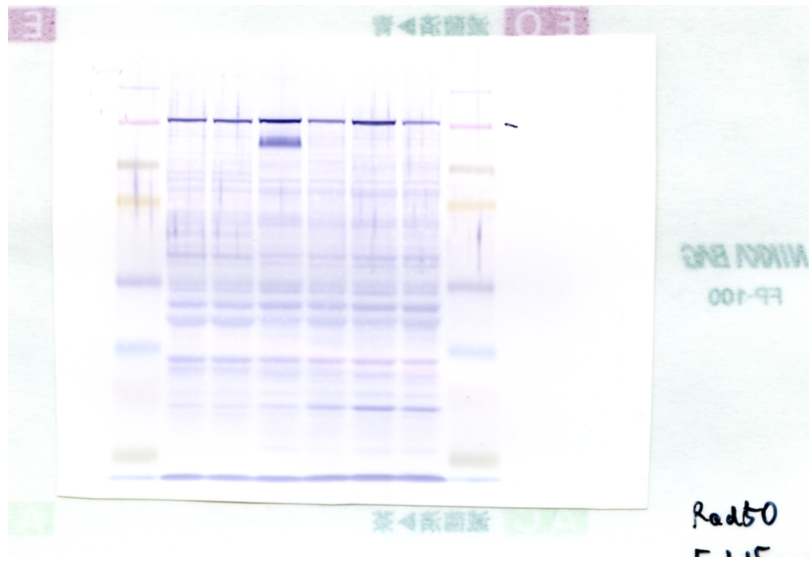

Fig. S2. RAD50. uncropped

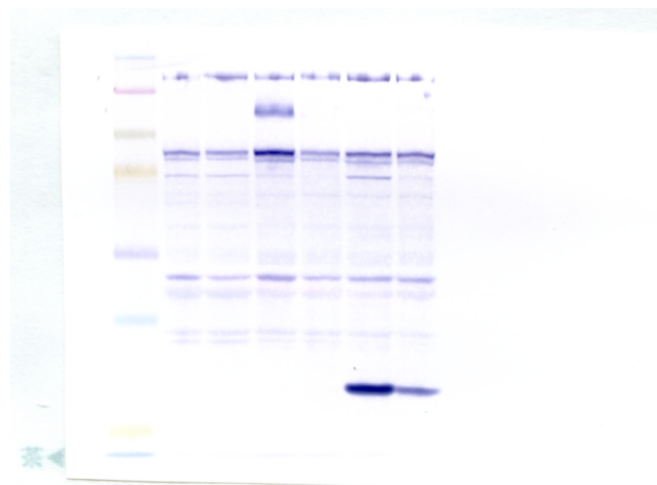

Fig. S2. NBS1. uncropped

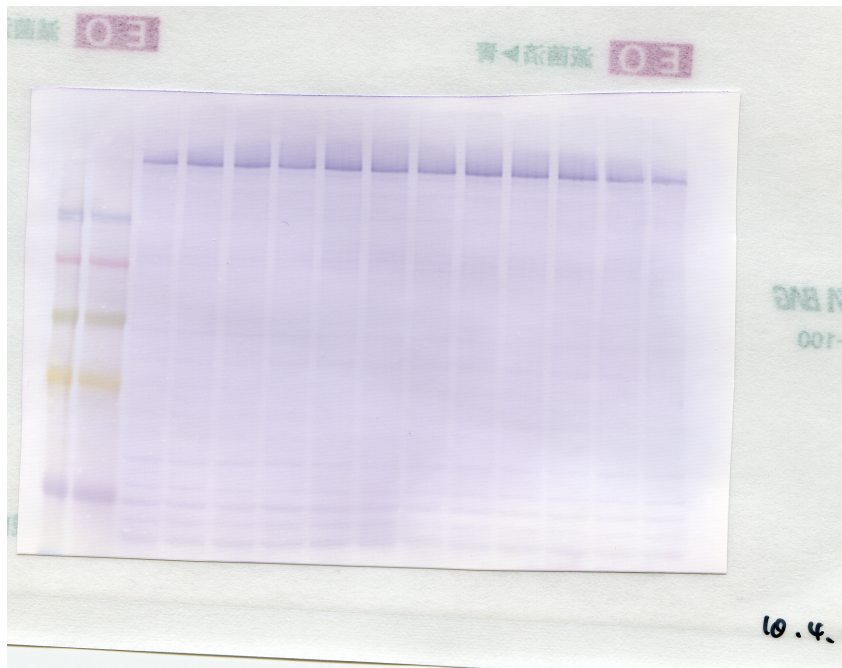

Fig. S2. BRCA1. uncropped

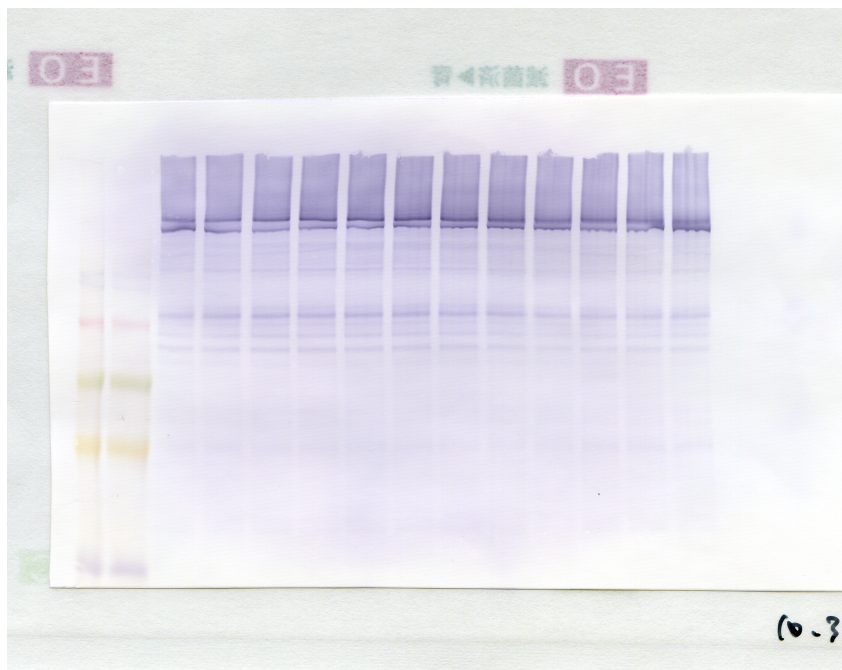

Fig. S2. BRCA2. uncropped

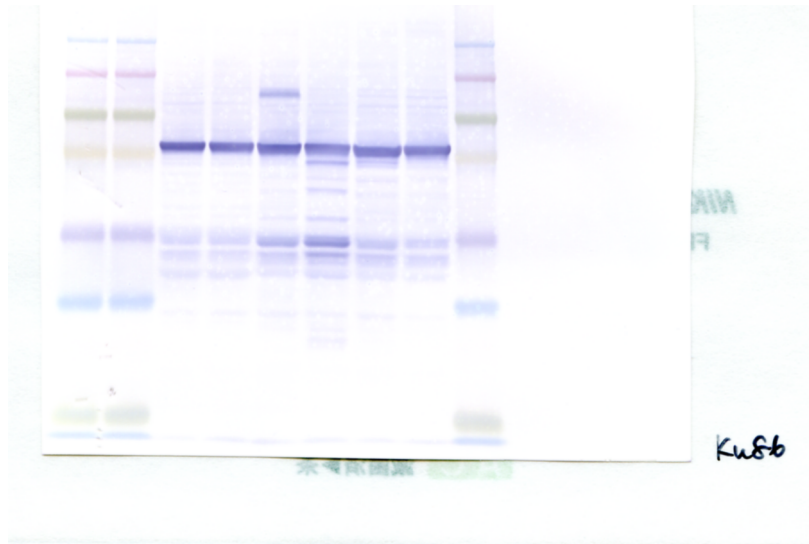

Fig. S2. Ku86. uncropped



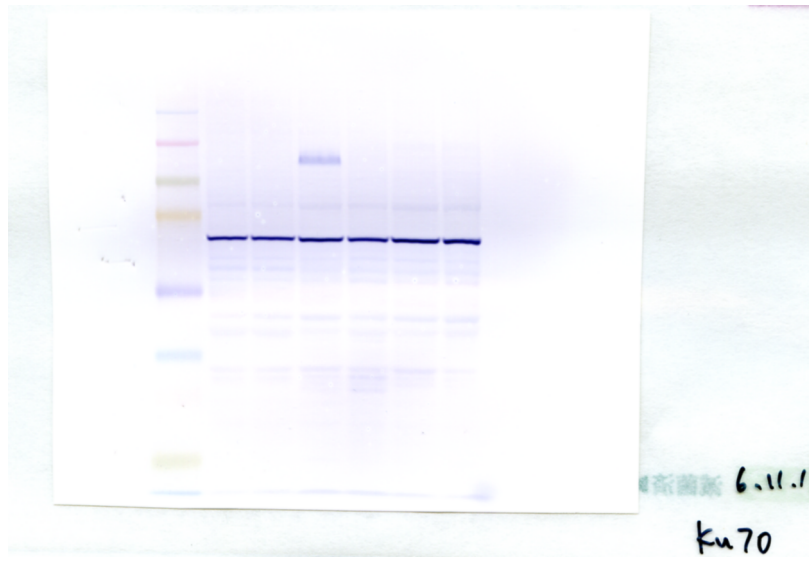

Fig. S2. Ku70. uncropped

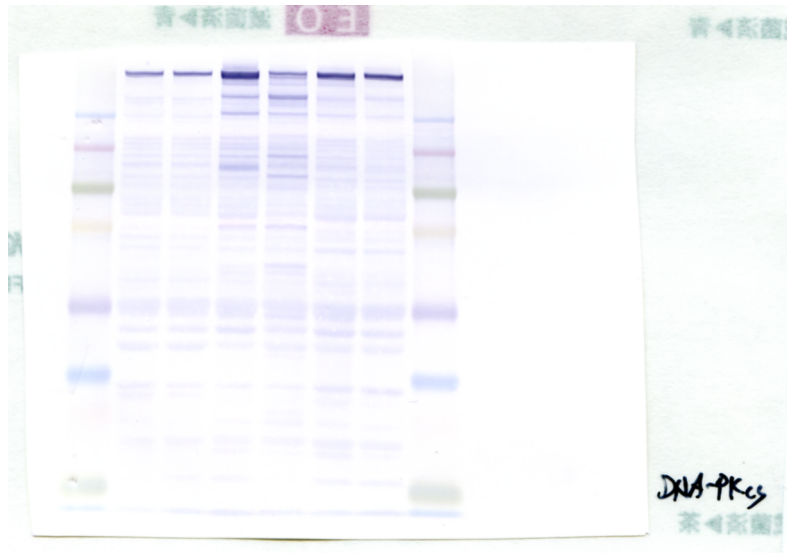

Fig. S2. DNA-PKcs. uncropped

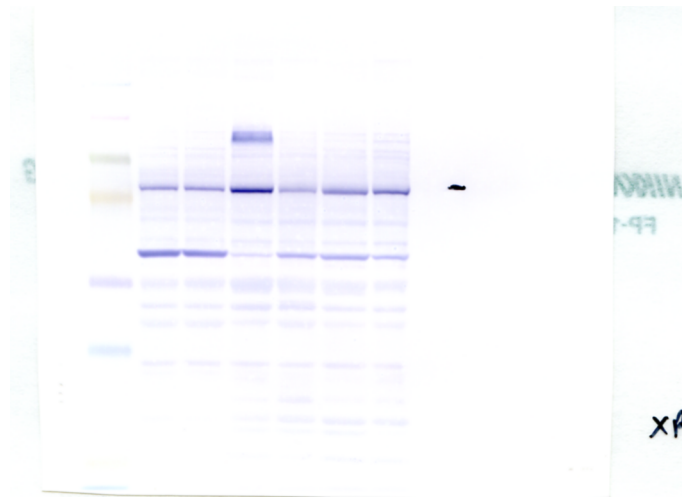

Fig. S2. XRCC4. uncropped

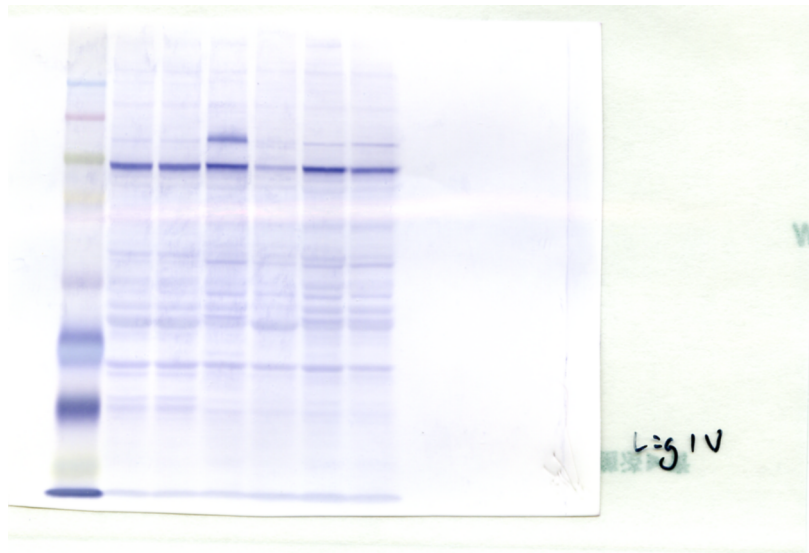

Fig. S2. LIG4. uncropped

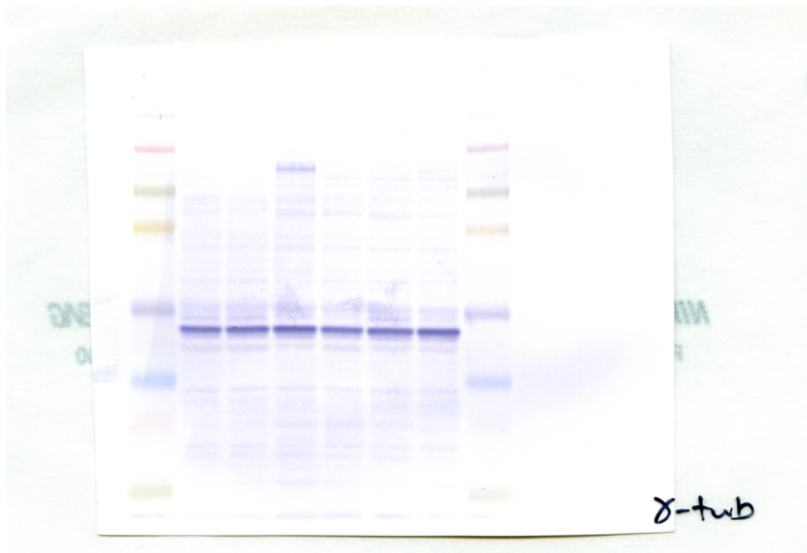

Fig. S2.  $\gamma$ -tubulin. uncropped
